# Supplementary material for: Halogenase-Targeted Genome Mining Leads to the Discovery of (±) Pestalachlorides A1a, A2a, and Their Atropisomers
Source: MDPI journal article supplement (doi:10.3390/antibiotics11101304), 2022-09-25
Supplement: s1 [file s1]

## *Supplementary Material*

# **Halogenase-Targeted Genome Mining Leads to the Discovery of ( $\pm$ ) Pestalachlorides A1a, A2a, and Their Atropisomers**

Mengna Luo<sup>†</sup>, Mengyuan Wang<sup>†</sup>, Shanshan Chang, Ning He, Guangzhi Shan\* and Yunying Xie\*

CAMS Key Laboratory of Synthetic Biology for Drug Innovation, Institute of Medicinal Biotechnology, Chinese Academy of Medical Sciences & Peking Union Medical College, Tiantan xili No.1, Beijing 100050, China

<sup>†</sup> These authors contributed equally to this work

### **\* Correspondence:**

Yunying Xie

xieyy@imb.pumc.edu.cn (Yunying Xie)

Guangzhi Shan

shanguangzhi@imb.pumc.edu.cn (Guangzhi Shan)

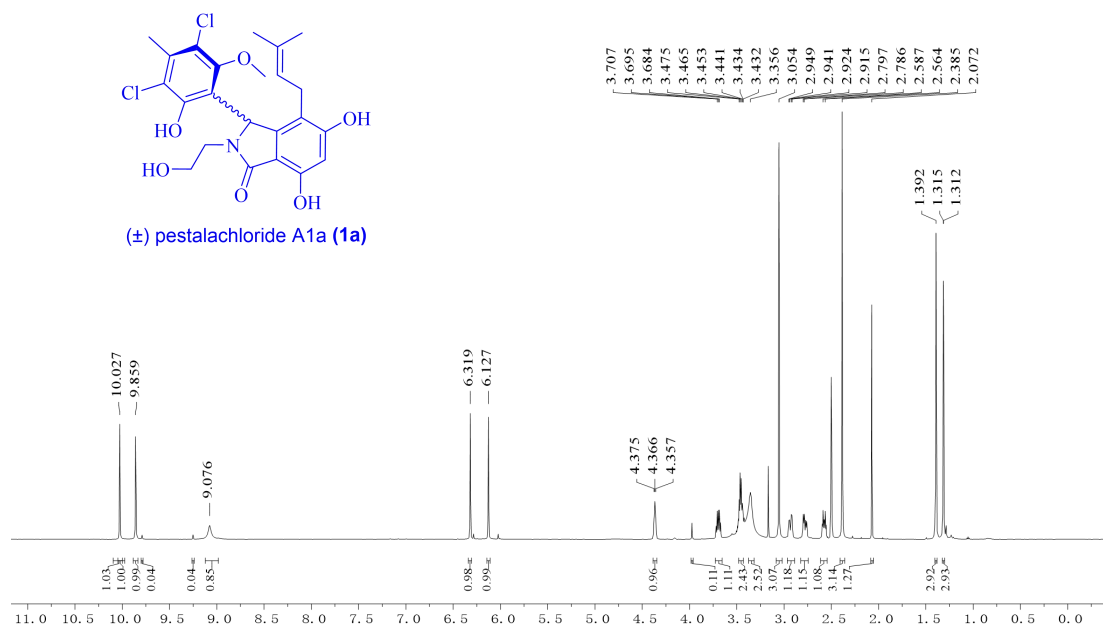

**Figure S1.**  $^1\text{H}$  NMR for pestalachloride A1a (**1a**) in DMSO- $d_6$  (600 MHz)

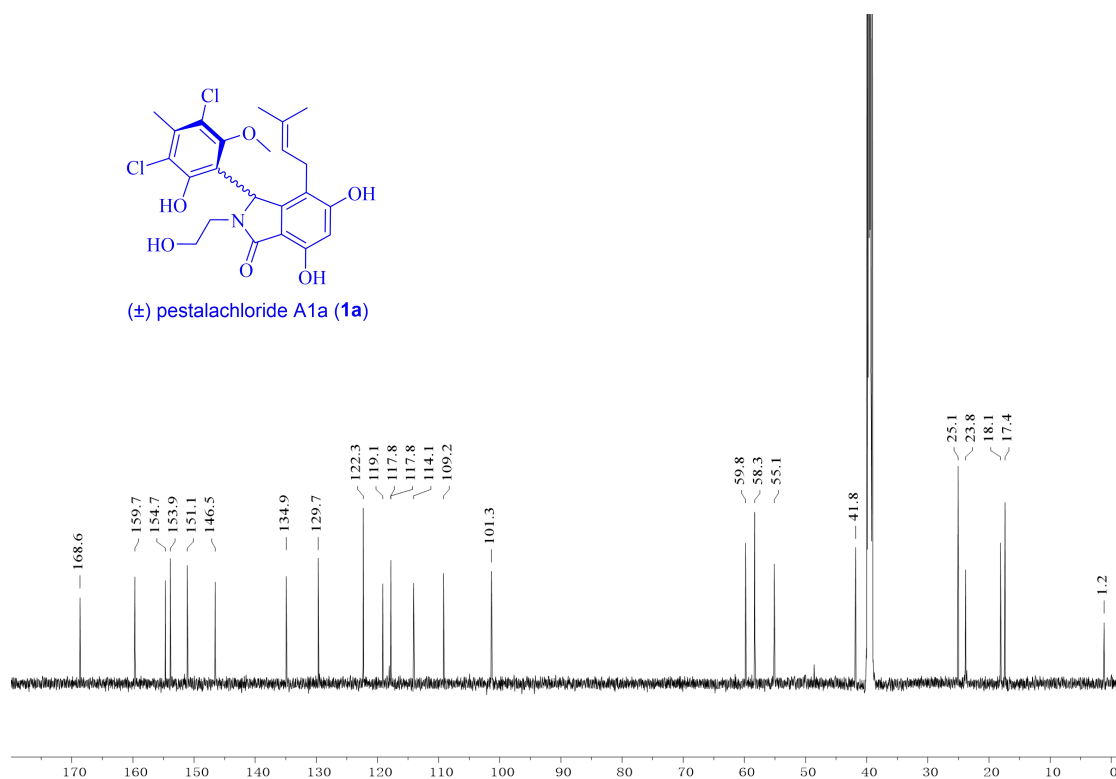

**Figure S2.**  $^{13}\text{C}$  NMR for pestalachloride A1a (**1a**) in DMSO- $d_6$  (150 MHz)

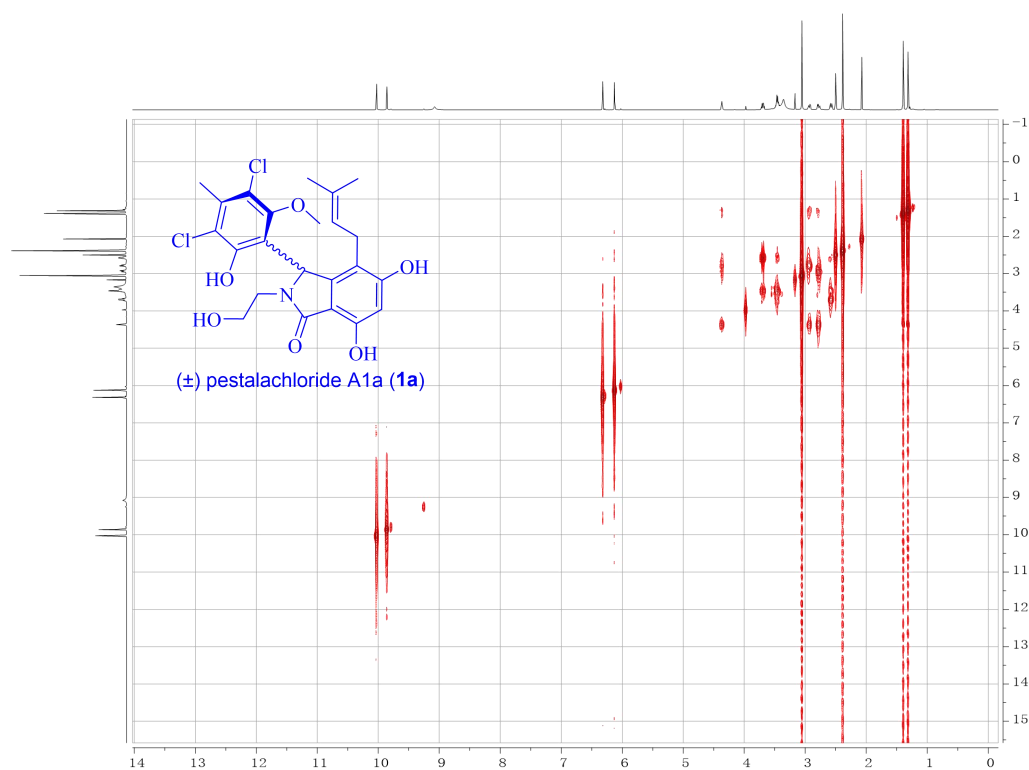

Figure S3. gCOSY for pestalachloride A1a (1a) in DMSO- $d_6$

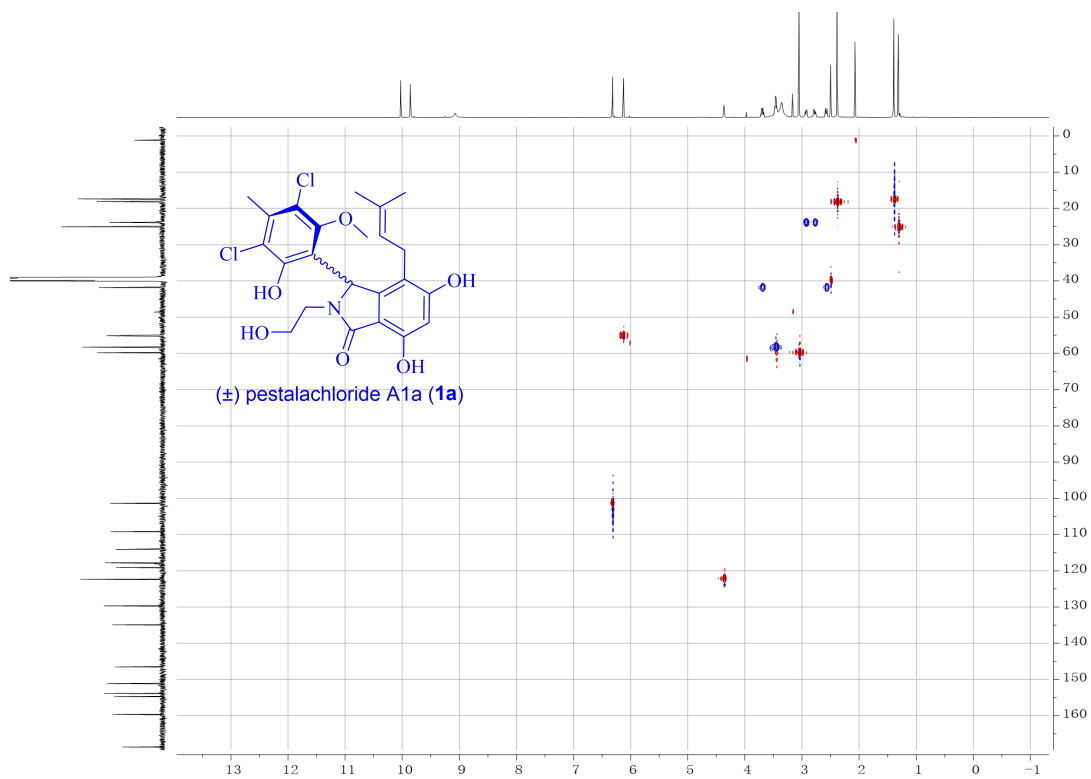

Figure S4. HSQC for pestalachloride A1a (1a) in DMSO- $d_6$

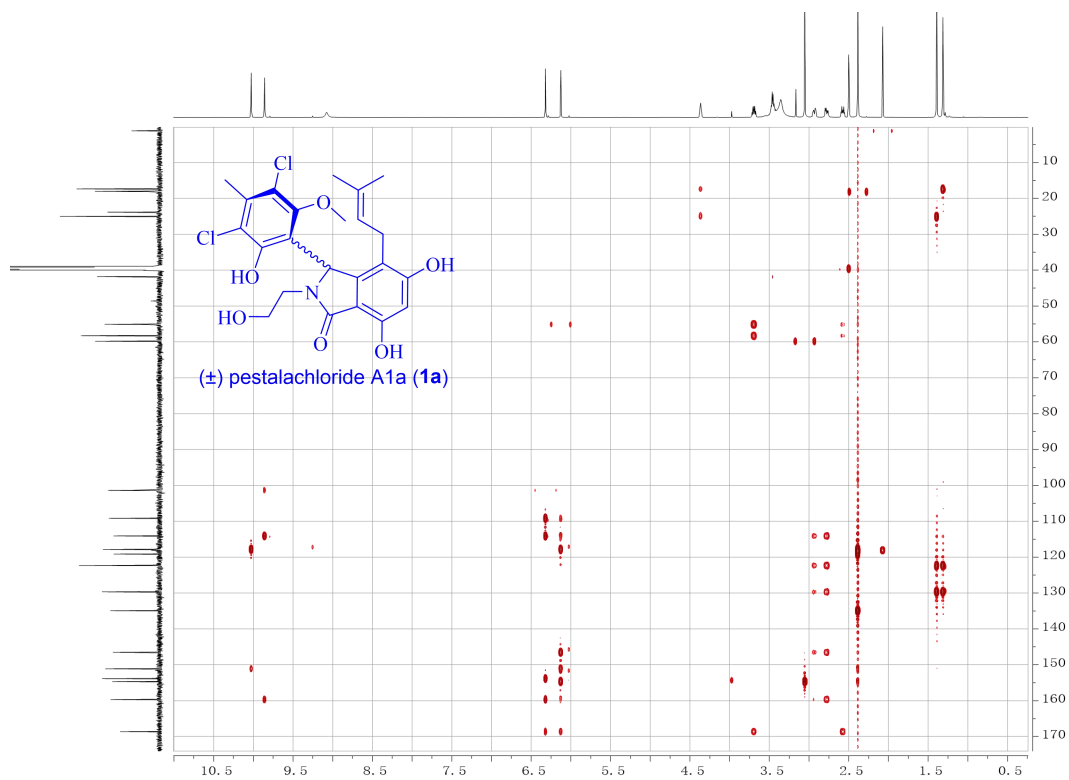Figure S5. HMBC for pestalachloride A1a (**1a**) in DMSO-*d*<sub>6</sub>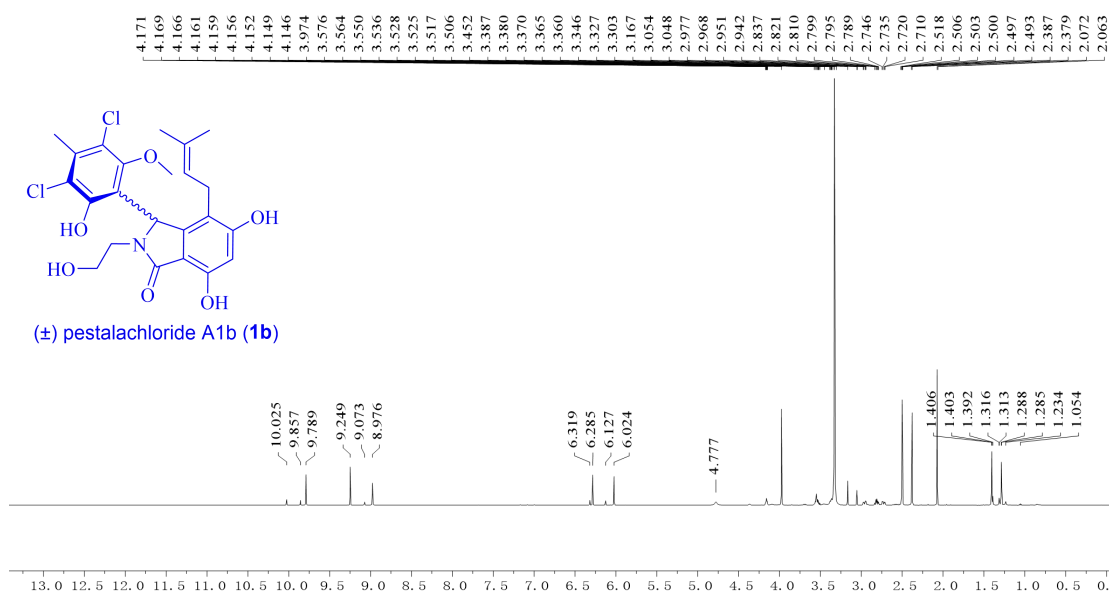Figure S6. <sup>1</sup>H NMR for pestalachloride A1b (**1b**) in DMSO-*d*<sub>6</sub> (600 MHz)

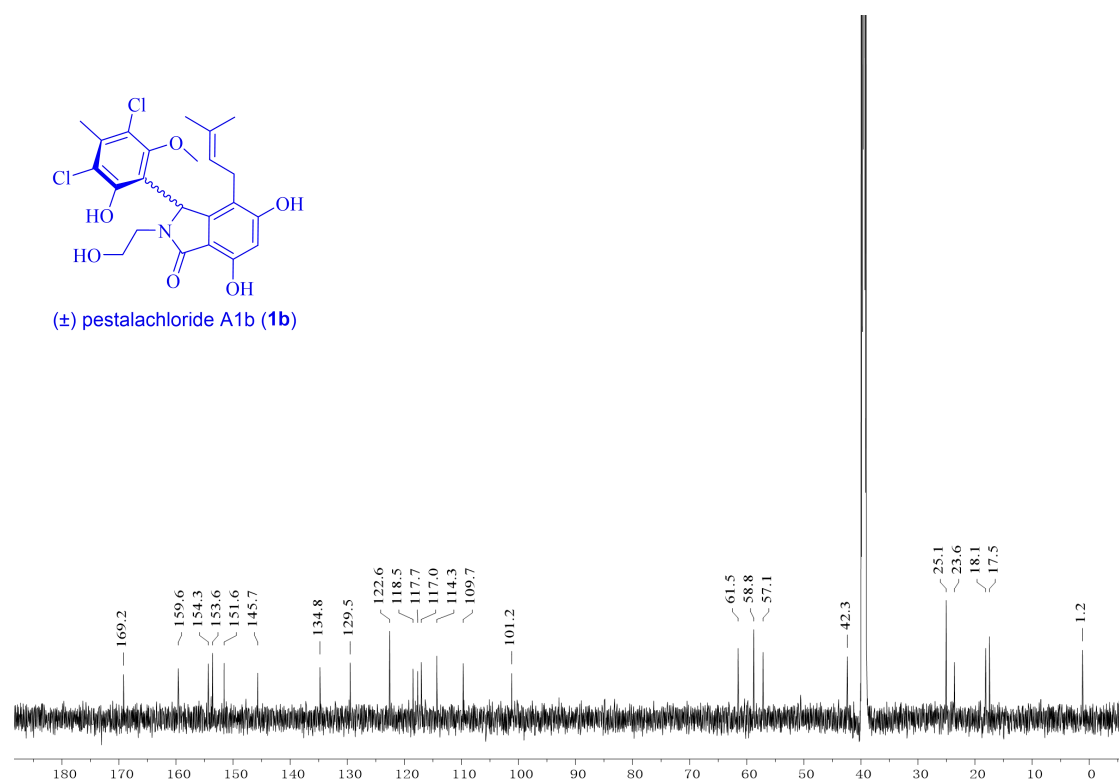

Figure S7.  $^{13}\text{C}$  NMR for pestalachloride A1b (1b) in  $\text{DMSO}-d_6$  (150 MHz)

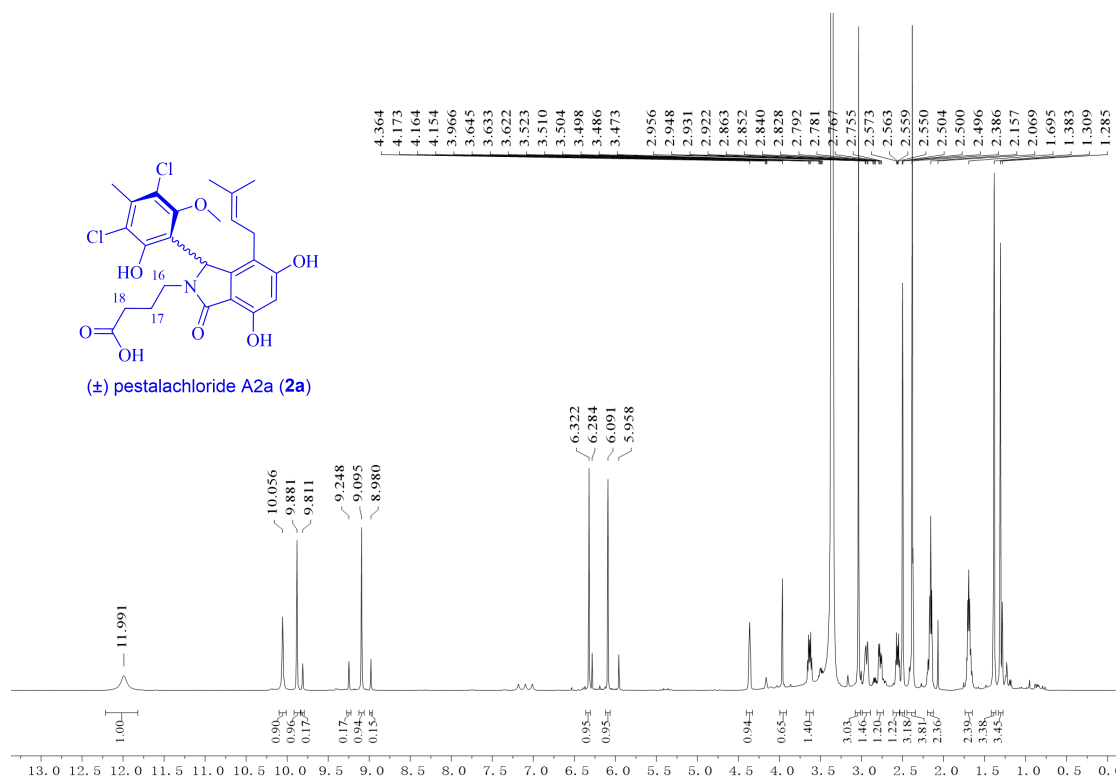

Figure S8.  $^1\text{H}$  NMR for pestalachloride A2a (2a) in  $\text{DMSO}-d_6$  (600 MHz)

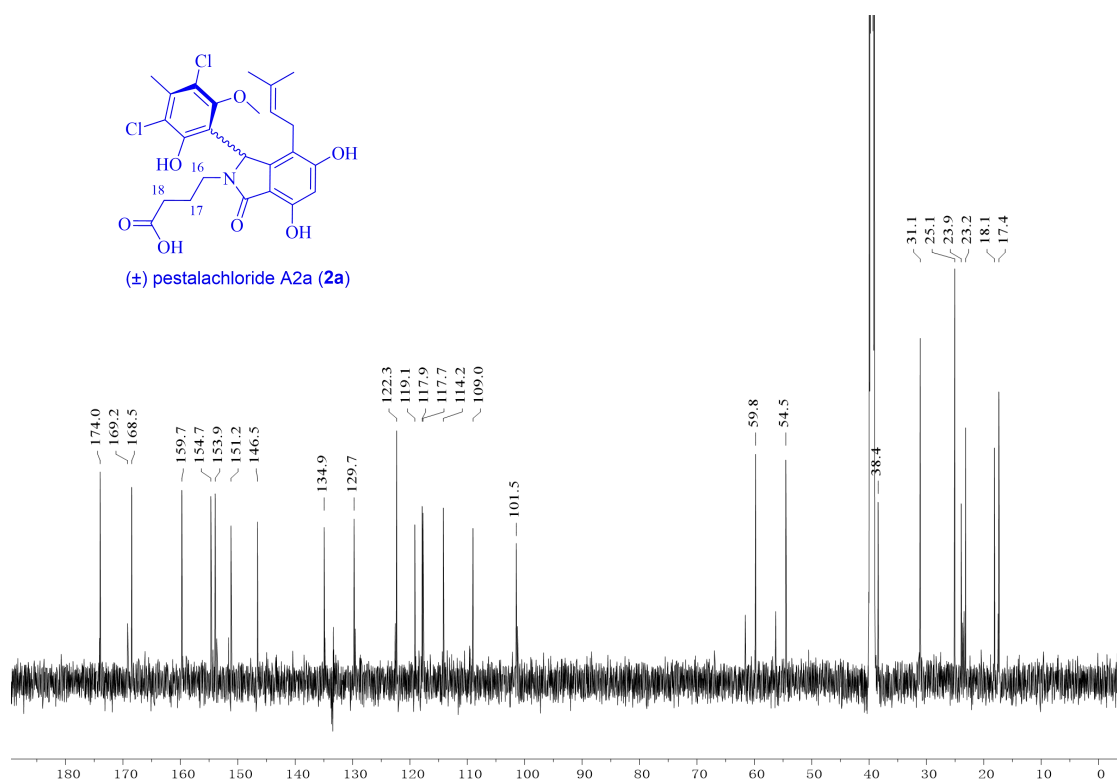

Figure S9.  $^{13}\text{C}$  NMR for pestalachloride A2a (**2a**) in  $\text{DMSO}-d_6$  (150 MHz)

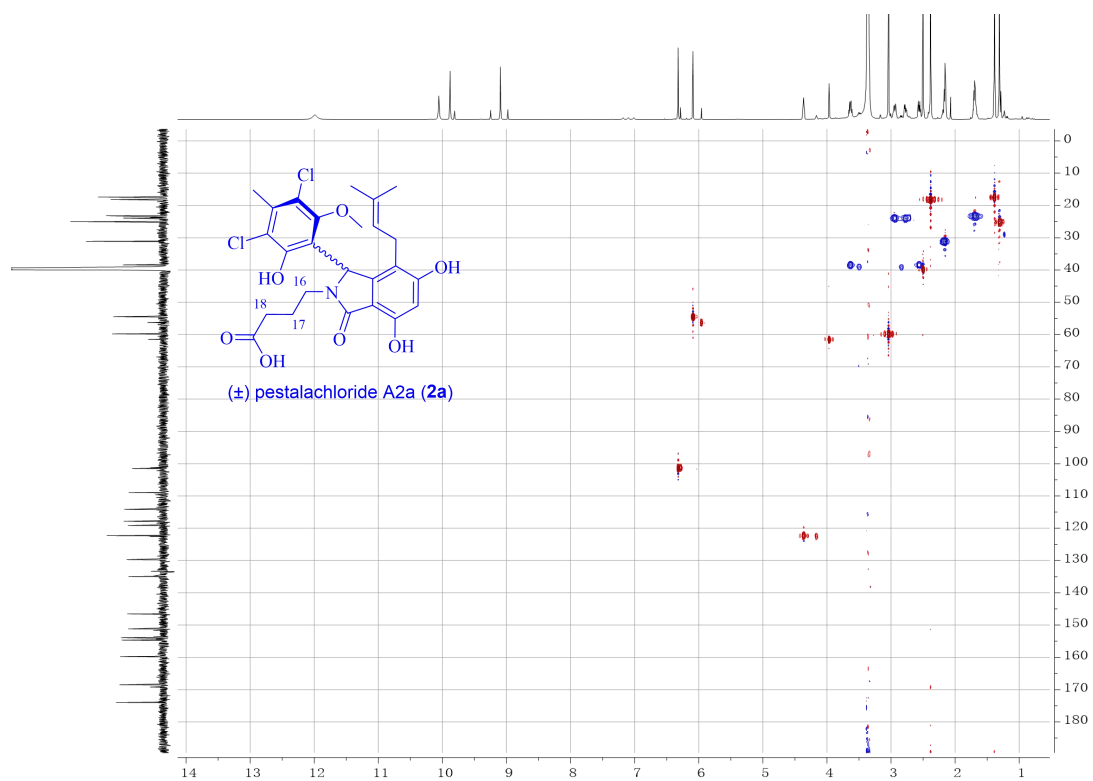

Figure S10. HSQC for pestalachloride A2a (**2a**) in  $\text{DMSO}-d_6$

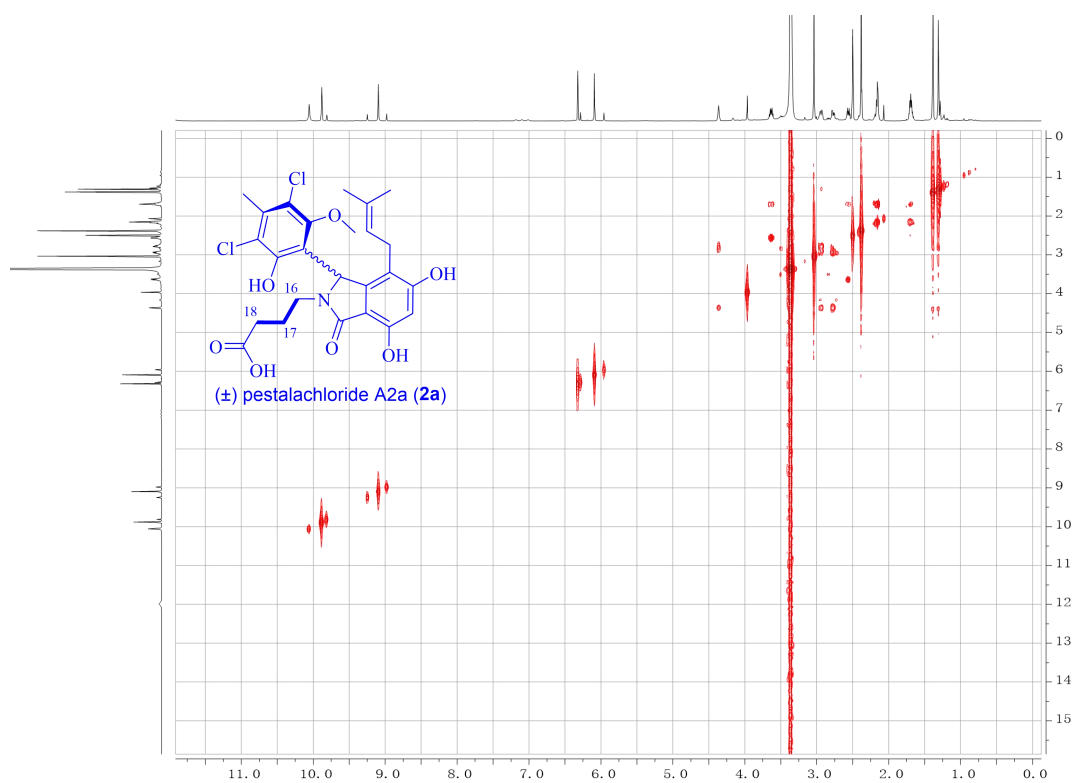

Figure S11. gCOSY for pestalachloride A2a (2a) in DMSO- $d_6$

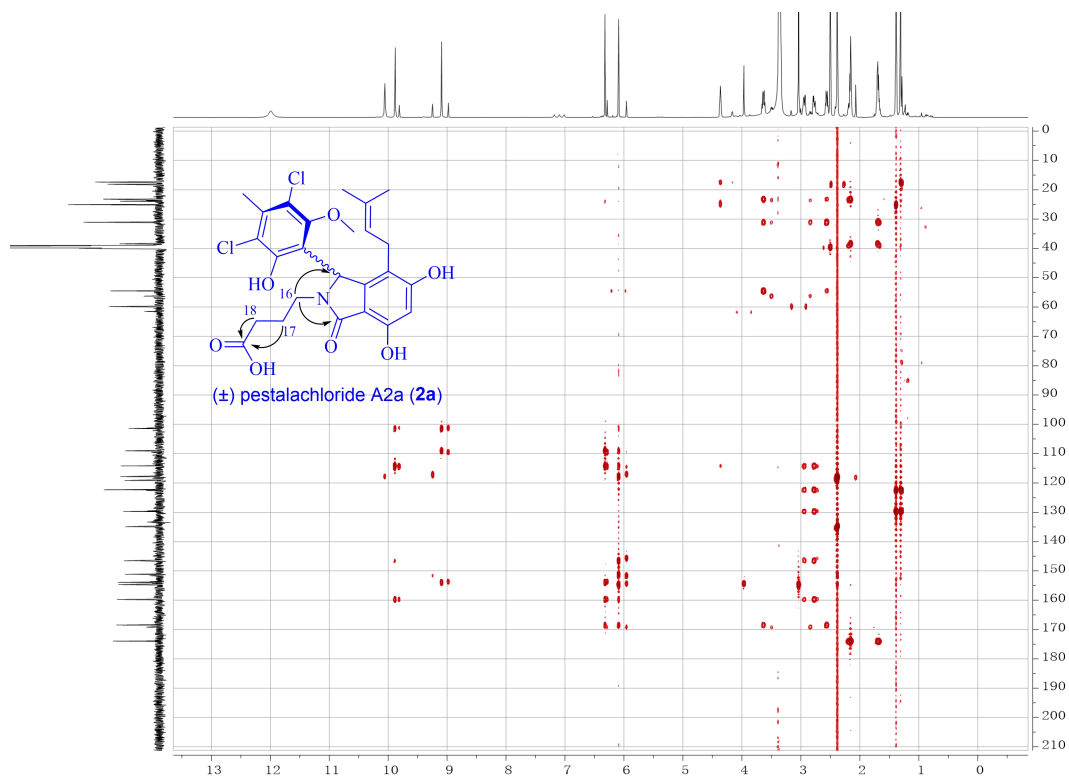

Figure S12. HMBC for pestalachloride A2a (2a) in DMSO- $d_6$

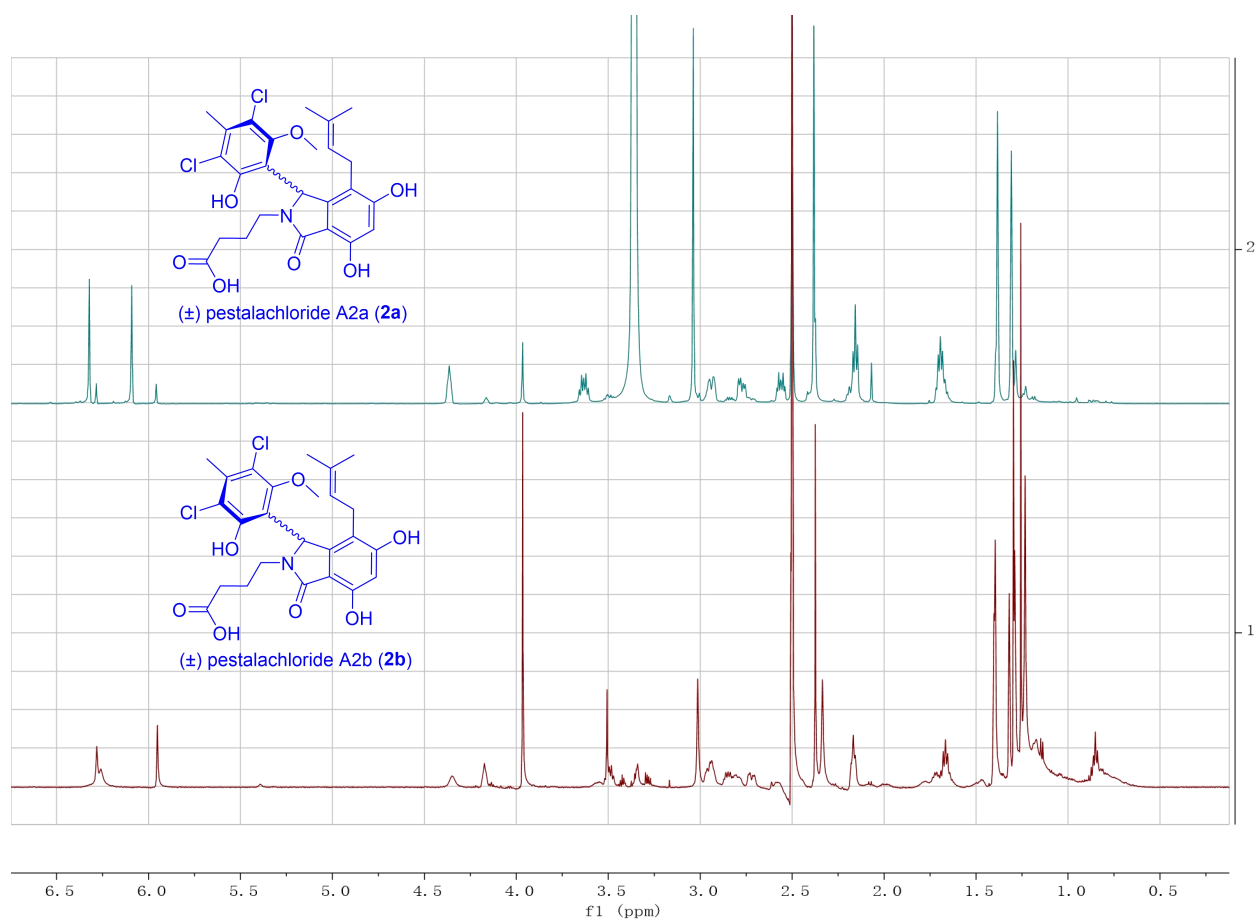

**Figure S13.**  $^1\text{H}$  NMR spectrum of pestalachloride A2b (**2b**) by comparison with that of pestalachloride A2a (**2a**) in  $\text{DMSO}-d_6$  (600 MHz)

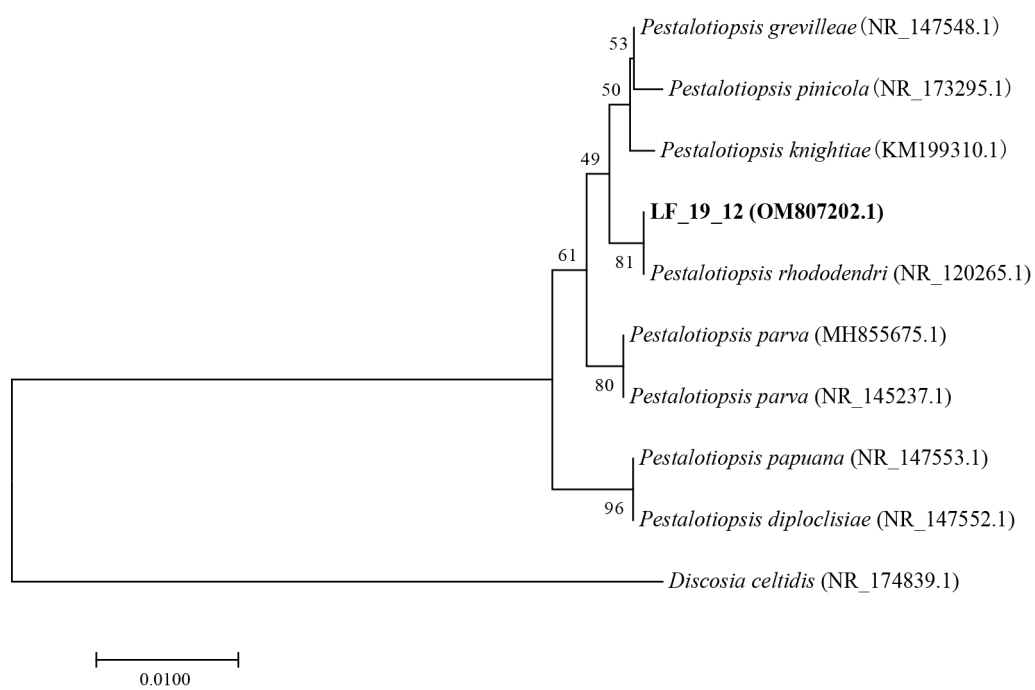

**Figure S14.** Phylogenetic NJ tree based on ITS squences from LF-19-12 and related type strains . The ITS sequence of *Discosia celtidis* was used as an outgroup. The GenBank accessions are shown in parentheses.
